# Supplementary material
Source: publisher site journal article supplement (https://www.degruyterbrill.com/publication/isbn/9783110333091/downloadAsset/9783110333091_Inhaltsverzeichnis.pdf)
Supplement: Supplementary file 1 [file 9783110333091_Inhaltsverzeichnis.pdf]

# Inhaltsverzeichnis

## Vorwort

## Einleitung

Werner Abraham & Elisabeth Leiss — 1

## Modalitätsformen und -funktionen: eine Zusammenschau

Werner Abraham

**Zur grammatischen Grundlegung von Modalität – semantisch-syntaktische Affinitäten zu nominaler Referenz, Aspekt und Quantifikation — 25**

Gabriele Diewald

**Modus und Modalverben – Kategorisierungsoptionen im grammatischen Kernbereich der Modalität — 77**

## Epistemik und Evidentialität

Ole Letnes

**Zum (evidentiellen?) Status von *werden* + Infinitiv — 113**

Katalin Horváth

**Sind reportative Modalverben epistemisch? — 131**

Anna Socka

**Skopus reportativer Ausdrücke in Komplementsätzen im Deutschen und Polnischen — 157**

## Modalität und Inferenz

Yoshiki Mori & Shinya Okano

**Evidentialität als Inferentialität — 189**

## **Versteckte Modalitätseffekte**

Maiko Nishiwaki

**Modalverben und die (In)Definitheit des Subjekts unter besonderer  
Berücksichtigung von *sollen* — 221**

## **Lexikalische Modalität im Sprachkontrast**

Attila Péteri

***wahrscheinlich* – vielseitiges modales Satzadverb im Sprach-  
kontrast — 251**

Tanja Mortelmans & Jeroen Vanderbiesen

**Komparative Modalkonstruktionen im Deutschen und Englische – oder  
deontische Modalität *revisited* — 279**

## **Modalität in Diachronie**

Michail L. Kotin

**Modalität und kategorialgrammatische Konvergenz aus genealogischer  
Sicht — 305**

Sonja Zeman

**Zur Diachronie der Modalverben: *sollen* zwischen *Temporalität*, *Modalität*  
und *Evidentialität* — 335**

## **Index — 367**

## **Adressen der Beiträger**
